# Supplementary material
Source: JCI journal article supplement (doi:10.1172/jci93358)
Supplement: sd1 [file 1]

## Supplemental Figures and Figure legends

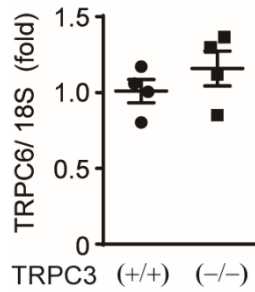

**Supplemental Figure 1. TRPC6 mRNA levels in TRPC3<sup>(+/+)</sup> or TRPC3<sup>(-/-)</sup> mouse hearts.** n=4. Data are shown as mean ± SEM.

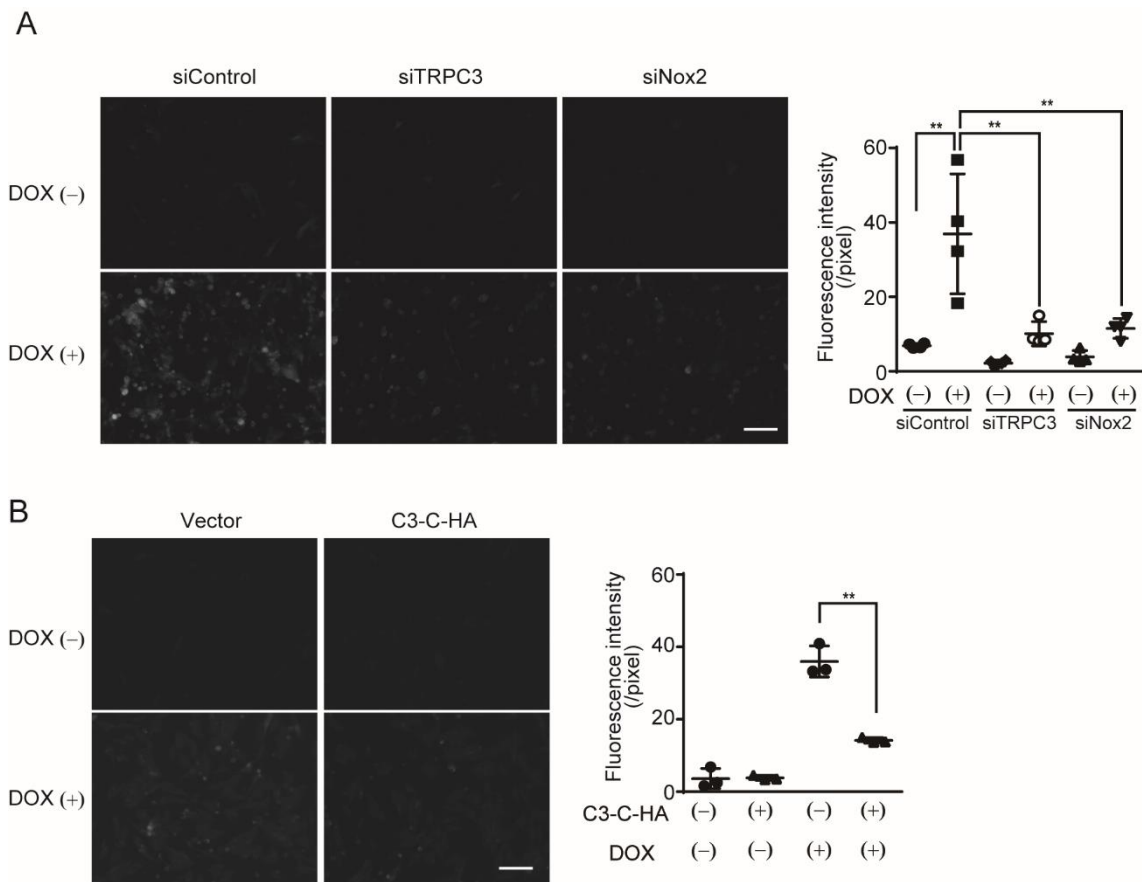

**Supplemental Figure 2. DOX-induced ROS production in H9c2 cells expressing Hyper. (A and B) Effect of siRNAs for TRPC3 or Nox2 (n=4, A) and HA-tagged C3-C fragment (C3-C-HA, n=3; B) on DOX-induced ROS production in H9c2 cells. Scale bar: 50  $\mu$ m. Data are shown as mean  $\pm$  SEM. Significance was determined by one-way ANOVA followed by Tukey's comparison test. \* $P$ <0.05, \*\* $P$ <0.01**

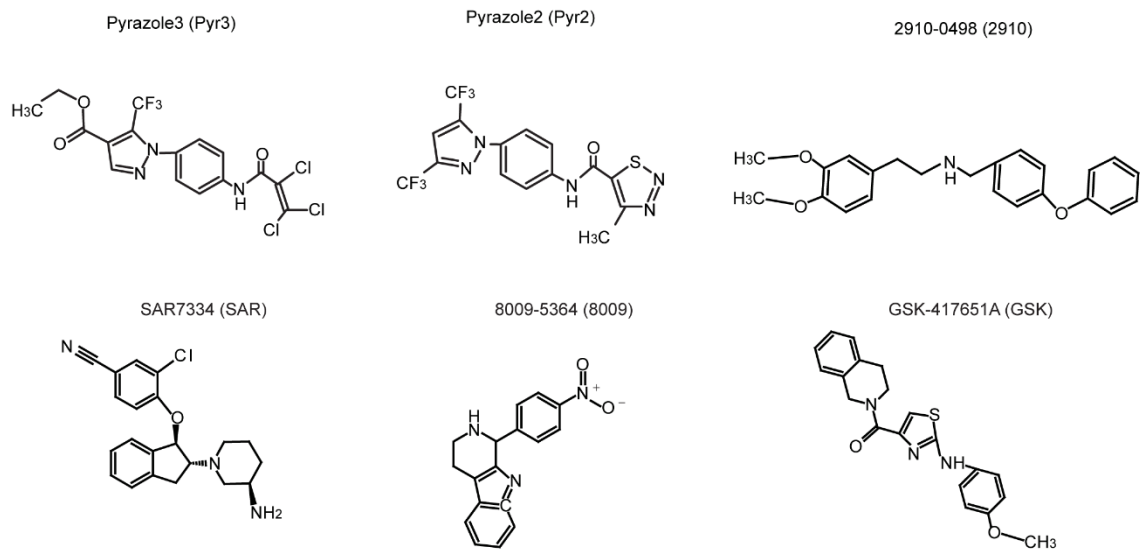

**Supplemental Figure 3. Chemical structures of TRPC3/6 inhibitors.**

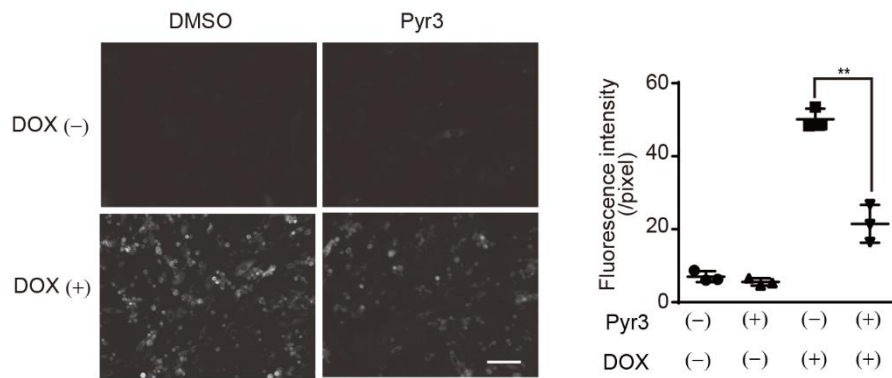

**Supplemental Figure 4. DOX-induced ROS production in H9c2 cells expressing Hyper in the presence or absence of Pyr3.** Scale bar: 50  $\mu\text{m}$ .  $n=3$ . Data are shown as mean  $\pm$  SEM. Significance was determined by one-way ANOVA followed by Tukey's comparison test.  $**P<0.01$

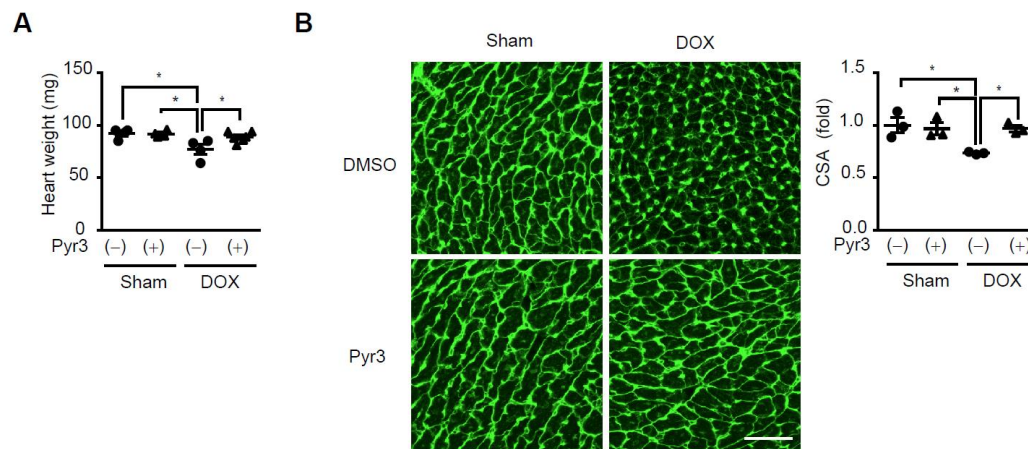

**Supplemental Figure 5. Prevention of DOX-induced cardiac atrophy by Pyr3 treatment.** (A and B) Decreases in heart weight (A) and cross sectional area (CSA) of cardiomyocytes (B) in C57BL/6J mouse hearts 2 weeks after administration of vehicle (Sham) or DOX (n=3). Scale bar: 50  $\mu$ m. \* $P$ <0.05

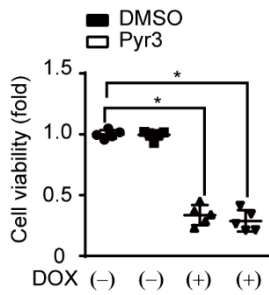

**Supplemental Figure 6. Effect of Pyr3 on the anti-tumor actions by DOX.** A549 cells were treated with DOX (10  $\mu$ M) and Pyr3 (3  $\mu$ M) for 24 h and cell viability was measured by MTT assay (n=5). Data are shown as mean  $\pm$  SEM. Significance was determined by one-way ANOVA followed by Tukey's comparison test. \* $P$ <0.05.

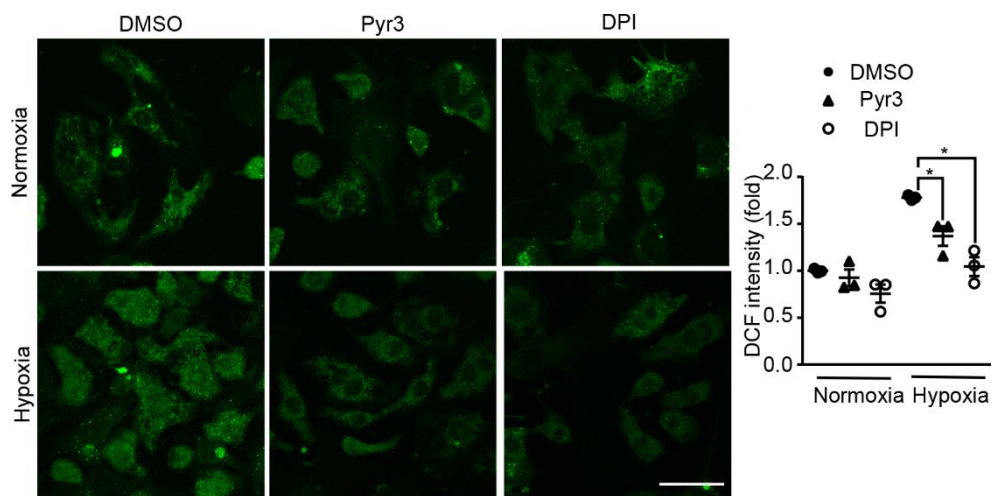

**Supplemental Figure 7. Effects of Pyr3 and DPI on hypoxia-induced ROS production.** NRCMs were exposed to 1% hypoxia for 12 h. Pyr3 (300 nM) or DPI (1  $\mu$ M) was applied 30 min prior to the hypoxia (n=3). Scale bar: 40  $\mu$ m. Data are shown as the mean  $\pm$  SEM. Significance was determined using one-way ANOVA followed by Tukey's comparison test. \* $P$ <0.05.

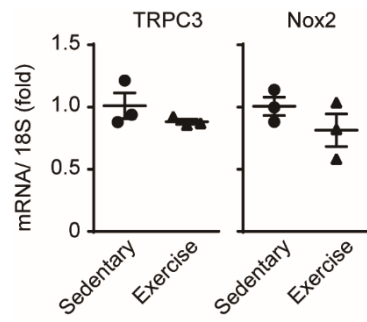

**Supplemental Figure 8. Expression levels of TRPC3 and Nox2 mRNAs in sedentary or exercised mouse hearts.** n=3. Data are shown as mean  $\pm$  SEM.
